# Supplementary material for: The Genomic Profile Associated with Risk of Severe Forms of COVID-19 in Amazonian Native American Populations
Source: MDPI journal article supplement (doi:10.3390/jpm12040554), 2022-04-01
Supplement: s1 [file s1]

**Supplementary Table S1** – Description of all variants for the genes ABO, CCR9, CXCR6, FYCO1, LZTFL1, SLC6A20, and XCR1 found in the 64 individuals sampled in the present study.

| Gene  | Position  | SNP ID      | Ref <sup>a</sup> | Var <sup>b</sup> | Impact Predicted by SNPeff | Variant Allele Frequency |       |       |       |       |       |
|-------|-----------|-------------|------------------|------------------|----------------------------|--------------------------|-------|-------|-------|-------|-------|
|       |           |             |                  |                  |                            | NA M                     | AFR   | AM R  | EAS   | EUR   | SAS   |
| ABO   | 133256189 | rs55727303  | C                | T                | HIGH                       | 0.281                    | 0.001 | 0.108 | -     | 0.012 | 0.026 |
| ABO   | 133255960 | rs8176745   | G                | A                | LOW                        | 0.806                    | 0.244 | 0.431 | 0.290 | 0.221 | 0.220 |
| ABO   | 133256050 | rs8176742   | C                | T                | LOW                        | 0.814                    | 0.136 | 0.421 | 0.289 | 0.220 | 0.219 |
| ABO   | 133256248 | rs200932155 | G                | A                | LOW                        | 0.000                    | 0.002 | -     | -     | 0.001 | -     |
| ABO   | 133255902 | rs8176748   | C                | T                | MODERATE                   | 0.814                    | 0.243 | 0.431 | 0.290 | 0.221 | 0.220 |
| ABO   | 133256085 | rs8176740   | A                | T                | MODERATE                   | 0.814                    | 0.242 | 0.431 | 0.289 | 0.221 | 0.220 |
| ABO   | 133256264 | rs1053878   | G                | A                | MODERATE                   | 0.016                    | 0.256 | 0.068 | 0.151 | 0.099 | 0.029 |
| ABO   | 133257465 | rs8176721   | G                | A                | MODERATE                   | 0.000                    | 0.155 | 0.017 | -     | 0.005 | -     |
| ABO   | 133257486 | rs8176720   | T                | C                | MODERATE                   | 0.814                    | 0.489 | 0.494 | 0.483 | 0.337 | 0.464 |
| ABO   | 133257246 | rs2073824   | A                | G                | MODIFIER                   | 0.728                    | 0.469 | 0.496 | 0.549 | 0.336 | 0.465 |
| ABO   | 133257320 | rs2073825   | A                | T                | MODIFIER                   | 0.235                    | 0.241 | 0.431 | 0.289 | 0.222 | 0.225 |
| ABO   | 133262062 | *           | C                | A                | MODIFIER                   | 0.016                    | -     | -     | -     | -     | -     |
| ABO   | 133275050 | rs616154    | C                | T                | MODIFIER                   | 0.031                    | 0.531 | 0.408 | 0.408 | 0.535 | 0.631 |
| ABO   | 133275068 | rs559723    | A                | G                | MODIFIER                   | 0.184                    | 0.531 | 0.408 | 0.408 | 0.536 | 0.631 |
| CCR9  | 45901310  | rs147314165 | A                | G                | LOW                        | 0.083                    | 0.007 | -     | -     | -     | -     |
| CCR9  | 45894830  | rs7648467   | C                | A                | MODIFIER                   | 0.014                    | 0.448 | 0.050 | -     | 0.013 | 0.008 |
| CCR9  | 45897524  | rs17764980  | G                | A                | MODIFIER                   | 0.000                    | 0.005 | 0.058 | 0.004 | 0.120 | 0.383 |
| CXCR6 | 45946488  | rs2234355   | G                | A                | MODERATE                   | 0.033                    | 0.491 | 0.068 | -     | 0.005 | 0.001 |
| FYCO1 | 45931236  | rs137986696 | C                | T                | LOW                        | 0.180                    | 0.001 | 0.053 | -     | -     | -     |
| FYCO1 | 45955269  | rs1463680   | G                | A                | LOW                        | 0.986                    | 0.901 | 0.840 | 0.954 | 0.744 | 0.878 |
| FYCO1 | 45959401  | *           | G                | A                | LOW                        | 0.019                    | -     | -     | -     | -     | -     |
| FYCO1 | 45959549  | rs536305273 | CAA              | C                | LOW                        | 0.000                    | 0.001 | 0.001 | -     | -     | -     |
| FYCO1 | 45966595  | rs13079869  | G                | A                | LOW                        | 0.070                    | 0.008 | 0.061 | 0.004 | 0.122 | 0.358 |
| FYCO1 | 45967024  | rs759955437 | C                | T                | LOW                        | 0.009                    | 0.000 | 0.000 | 0.000 | 0.000 | 0.000 |
| FYCO1 | 45967999  | rs3796376   | C                | T                | LOW                        | 0.000                    | 0.033 | 0.154 | 0.293 | 0.208 | 0.156 |
| FYCO1 | 45968128  | rs34147726  | C                | T                | LOW                        | 0.023                    | 0.354 | 0.030 | -     | -     | -     |
| FYCO1 | 45968515  | rs13071283  | T                | C                | LOW                        | 0.070                    | 0.020 | 0.063 | 0.004 | 0.124 | 0.360 |
| FYCO1 | 45979726  | rs4682801   | G                | T                | LOW                        | 0.963                    | 0.384 | 0.869 | 1.000 | 0.797 | 0.921 |
| FYCO1 | 45923752  | rs35678722  | G                | A                | MODERATE                   | 0.083                    | 0.012 | 0.001 | -     | -     | -     |
| FYCO1 | 45966331  | rs13079478  | G                | T                | MODERATE                   | 0.070                    | 0.005 | 0.059 | 0.004 | 0.122 | 0.360 |
| FYCO1 | 45966333  | rs13059238  | T                | C                | MODERATE                   | 0.070                    | 0.019 | 0.063 | 0.004 | 0.123 | 0.359 |

|             |          |                  |          |   |          |       |       |       |       |       |       |
|-------------|----------|------------------|----------|---|----------|-------|-------|-------|-------|-------|-------|
| FYCO1       | 45966722 | rs113517878      | C        | T | MODERATE | 0.083 | 0.003 | 0.003 | -     | -     | -     |
| FYCO1       | 45967298 | rs3796375        | G        | A | MODERATE | 0.822 | 0.093 | 0.565 | 0.661 | 0.431 | 0.372 |
| FYCO1       | 45967995 | rs33910087       | G        | A | MODERATE | 0.070 | 0.017 | 0.059 | 0.005 | 0.122 | 0.359 |
| FYCO1       | 45968372 | rs3733100        | C        | G | MODERATE | 0.885 | 0.210 | 0.643 | 0.667 | 0.556 | 0.731 |
| FYCO1       | 45968585 | rs4683158        | C        | T | MODERATE | 0.994 | 0.982 | 0.914 | 1.000 | 0.801 | 0.922 |
| FYCO1       | 45979767 | rs130673384<br>6 | C        | T | MODERATE | 0.000 | 0.000 | 0.000 | 0.000 | 0.000 | 0.000 |
| FYCO1       | 45923467 | rs6800954        | C        | T | MODIFIER | 0.143 | 0.287 | 0.193 | 0.307 | 0.216 | 0.148 |
| FYCO1       | 45936407 | rs1873002        | T        | C | MODIFIER | 1.000 | 1.000 | 1.000 | 1.000 | 1.000 | 1.000 |
| FYCO1       | 45938385 | rs9875616        | G        | A | MODIFIER | 0.859 | 0.914 | 0.850 | 0.954 | 0.746 | 0.879 |
| FYCO1       | 45959378 | rs13069079       | G        | A | MODIFIER | 0.000 | 0.005 | 0.058 | 0.004 | 0.121 | 0.371 |
| FYCO1       | 45959571 | rs1532071        | G        | A | MODIFIER | 0.908 | 0.260 | 0.614 | 0.652 | 0.529 | 0.732 |
| FYCO1       | 45959735 | rs76597151       | G        | A | MODIFIER | 0.014 | 0.017 | 0.062 | 0.004 | 0.122 | 0.371 |
| FYCO1       | 45969944 | rs17214952       | A        | G | MODIFIER | 0.014 | 0.019 | 0.063 | 0.004 | 0.123 | 0.360 |
| FYCO1       | 45973053 | rs41289622       | T        | G | MODIFIER | 0.070 | 0.005 | 0.059 | 0.004 | 0.122 | 0.361 |
| FYCO1       | 45975359 | rs751552         | A        | T | MODIFIER | 0.814 | 0.063 | 0.565 | 0.661 | 0.431 | 0.371 |
| FYCO1       | 45981341 | rs36122610       | G        | A | MODIFIER | 0.054 | 0.005 | 0.059 | 0.004 | 0.122 | 0.358 |
| FYCO1       | 45984767 | rs3733097        | G        | A | MODIFIER | 0.853 | 0.067 | 0.561 | 0.655 | 0.432 | 0.372 |
| LZTFL1      | 45828480 | rs1129183        | C        | T | MODERATE | 0.000 | 0.043 | 0.038 | 0.039 | 0.074 | 0.077 |
| LZTFL1      | 45827235 | *                | TCT<br>G | T | MODIFIER | 0.016 | -     | -     | -     | -     | -     |
| LZTFL1      | 45842023 | rs138230559      | C        | T | MODIFIER | 0.009 | 0.033 | -     | -     | -     | -     |
| LZTFL1      | 45842083 | rs141398338      | A        | C | MODIFIER | 0.083 | 0.005 | -     | -     | 0.002 | -     |
| SLC6A2<br>0 | 45775836 | rs13314717       | C        | T | LOW      | 0.083 | 0.125 | 0.014 | -     | 0.003 | -     |
| SLC6A2<br>0 | 45775926 | rs758386         | A        | G | LOW      | 0.994 | 0.972 | 0.977 | 0.911 | 0.954 | 0.932 |
| SLC6A2<br>0 | 45780081 | rs2742399        | G        | C | LOW      | 0.016 | 0.187 | 0.022 | 0.004 | 0.011 | 0.076 |
| SLC6A2<br>0 | 45759079 | rs140440513      | C        | T | MODERATE | 0.083 | 0.000 | 0.000 | 0.000 | 0.000 | 0.000 |
| SLC6A2<br>0 | 45759901 | rs61731475       | T        | C | MODERATE | 0.000 | -     | 0.006 | -     | 0.014 | -     |
| SLC6A2<br>0 | 45772602 | rs17279437       | G        | A | MODERATE | 0.017 | 0.005 | 0.043 | 0.006 | 0.092 | 0.031 |
| SLC6A2<br>0 | 45775922 | rs139429025      | T        | C | MODERATE | 0.000 | 0.012 | -     | -     | -     | -     |
| SLC6A2<br>0 | 45758379 | rs2251347        | C        | T | MODIFIER | 0.994 | 0.990 | 0.976 | 0.921 | 0.954 | 0.972 |

|             |          |             |   |   |          |       |       |       |       |       |       |
|-------------|----------|-------------|---|---|----------|-------|-------|-------|-------|-------|-------|
| SLC6A2<br>0 | 45760066 | rs116638840 | C | T | MODIFIER | 0.027 | 0.076 | 0.010 | -     | -     | 0.003 |
| SLC6A2<br>0 | 45762899 | rs2191027   | C | T | MODIFIER | 0.014 | 0.020 | 0.193 | 0.017 | 0.299 | 0.149 |
| SLC6A2<br>0 | 45780132 | rs2252547   | T | C | MODIFIER | 0.155 | 0.465 | 0.614 | 0.450 | 0.591 | 0.516 |
| XCR1        | 46021837 | rs2230322   | T | C | LOW      | 0.109 | 0.443 | 0.091 | 0.047 | 0.124 | 0.354 |

<sup>a</sup> Reference Allele; <sup>b</sup> Variant Allele; \* Variants without described SNP; (-) – No annotation; NAM: Amazonian Native American populations; AFR: African population; AMR: American population; EAS: East Asian population; EUR: European population; SAS: South Asian population
